# Supplementary material
Source: HighWire-hosted journal article supplement (https://diabetes.diabetesjournals.org/content/suppl/2006/01/31/55.2.487)
Supplement: db1201OnlineAppendix.pdf [file db1201OnlineAppendix.pdf]

**Supplement Table 1A****Direct Intracellular Regulators of Apoptosis**

| <b>Array 1</b> | <b>Array 2</b> | <b>Mean</b> | <b>Name</b> | <b>Description</b>                                                          |
|----------------|----------------|-------------|-------------|-----------------------------------------------------------------------------|
| 1.5            | 2.2            | 1.9         | ATM         | ataxia telangiectasia mutated homolog                                       |
| 1.9            | 1.8            | 1.9         | Bcl2a1a     | B-cell leukemia/lymphoma 2 related protein A1a                              |
| 1.6            | 2.1            | 1.9         | Birc1a      | baculoviral IAP repeat-containing 1a                                        |
| 2.3            | 1.3            | 1.8         | BBC3        | Bcl-2 binding component 3                                                   |
| 1.7            | 1.8            | 1.8         | AVEN        | apoptosis, caspase activation inhibitor                                     |
| 2.2            | 1.2            | 1.7         | CIDEB       | cell death-inducing DFFA-like effector b                                    |
| 1.7            | 1.6            | 1.7         | TNFAIP3     | tumor necrosis factor, alpha-induced protein 3                              |
| 1.6            | 1.7            | 1.6         | MOAP1       | modulator of apoptosis 1                                                    |
| 1.5            | 1.7            | 1.6         | Bid3        | BH3 interacting (with BCL2 family) domain, apoptosis agonist                |
| 1.7            | 1.5            | 1.6         | BIRC2       | baculoviral IAP repeat-containing 2                                         |
| 1.5            | 1.7            | 1.6         | BNIP3       | BCL2/adenovirus E1B 19kDa interacting protein 3                             |
| 1.6            | 1.6            | 1.6         | CARD6       | caspase recruitment domain family, member 6                                 |
| 1.6            | 1.6            | 1.6         | CASP12      | caspase 12                                                                  |
| 1.5            | 1.7            | 1.6         | HD          | huntingtin (Huntington disease)                                             |
| 1.5            | 1.7            | 1.6         | HRK         | harakiri, BCL2 interacting protein (contains only BH3 domain)               |
| 1.2            | 1.8            | 1.5         | AATK        | apoptosis-associated tyrosine kinase                                        |
| 1.6            | 1.4            | 1.5         | BAG3        | BCL2-associated athanogene 3                                                |
| 1.4            | 1.6            | 1.5         | RIPK2       | receptor-interacting serine-threonine kinase 2                              |
| 1.2            | 1.8            | 1.5         | RIPK3       | receptor-interacting serine-threonine kinase 3                              |
| 1.4            | 1.5            | 1.5         | TP53INP1    | transformation related protein 53 inducible nuclear protein 1               |
| 1.5            | 1.4            | 1.5         | PDCD2       | programmed cell death 2                                                     |
| 1.5            | 1.4            | 1.5         | PDCD5       | programmed cell death 5                                                     |
| 1.5            | 1.4            | 1.4         | DFFB        | DNA fragmentation factor, 40kDa, beta polypeptide (caspase-activated DNase) |
| 1.4            | 1.4            | 1.4         | BCL10       | B-cell CLL/lymphoma 10                                                      |
| 1.4            | 1.4            | 1.4         | DPF2        | D4, zinc and double PHD fingers family 2                                    |
| 1.3            | 1.4            | 1.4         | BAG4        | BCL2-associated athanogene 4                                                |
| 1.4            | 1.3            | 1.4         | BFAR        | bifunctional apoptosis regulator                                            |
| 1.3            | 1.4            | 1.4         | CASP11      | caspase 11, apoptosis-related cysteine protease                             |
| 1.3            | 1.4            | 1.4         | CASP4       | caspase 4, apoptosis-related cysteine protease                              |
| 1.3            | 1.4            | 1.4         | DAP3        | death associated protein 3                                                  |
| 1.3            | 1.4            | 1.4         | TAX1BP1     | Tax1 (human T-cell leukemia virus type I) binding protein 1                 |
| 1.3            | 1.4            | 1.3         | BCL2L13     | BCL2-like 13 (apoptosis facilitator)                                        |
| 1.4            | 1.3            | 1.3         | MAPK8IP1    | mitogen activated protein kinase 8 interacting protein                      |
| 1.3            | 1.3            | 1.3         | BAG1        | BAG-family molecular chaperone regulator-1                                  |
| 1.1            | 1.5            | 1.3         | PDCD8       | programmed cell death 8                                                     |
| 1.3            | 1.3            | 1.3         | PTEN        | phosphatase and tensin homolog                                              |

|     |     |     |          |                                                                                                                            |
|-----|-----|-----|----------|----------------------------------------------------------------------------------------------------------------------------|
| 1.3 | 1.3 | 1.3 | RNF7     | ring finger protein 7                                                                                                      |
| 1.2 | 1.4 | 1.3 | DAP      | death-associated protein                                                                                                   |
| 1.2 | 1.4 | 1.3 | PDCD6    | programmed cell death 6                                                                                                    |
| 1.3 | 1.3 | 1.3 | PRDX2    | peroxiredoxin 2                                                                                                            |
| 1.3 | 1.2 | 1.3 | BNIP3L   | BCL2/adenovirus E1B 19kDa interacting protein 3-like                                                                       |
| 1.1 | 1.4 | 1.3 | CTNBL1   | catenin, beta like 1                                                                                                       |
| 1.2 | 1.3 | 1.3 | CUL1     | cullin 1                                                                                                                   |
| 1.3 | 1.2 | 1.2 | PDCD7    | programmed cell death 7                                                                                                    |
| 1.2 | 1.3 | 1.2 | GSK3B    | glycogen synthase kinase 3 beta                                                                                            |
| 1.3 | 1.2 | 1.2 | HSPA1B   | heat shock protein 1A /// heat shock protein 1B                                                                            |
| 1.2 | 1.3 | 1.2 | NIPA     | nuclear interacting partner of anaplastic lymphoma kinase (Alk)                                                            |
| 1.3 | 1.1 | 1.2 | BBP      | beta-amyloid binding protein precursor<br>caspase 1, apoptosis-related cysteine protease (interleukin 1, beta, convertase) |
| 1.1 | 1.3 | 1.2 | CASP1    |                                                                                                                            |
| 1.3 | 1.1 | 1.2 | STK17B   | serine/threonine kinase 17b (apoptosis-inducing)                                                                           |
| 1.2 | 1.2 | 1.2 | CYCS     | cytochrome c, somatic<br>non-metastatic cells 6, protein expressed in (nucleoside-diphosphate kinase)                      |
| 1.5 | 0.9 | 1.2 | NME6     |                                                                                                                            |
| 1.2 | 1.2 | 1.2 | RAF1     | v-raf-1 murine leukemia viral oncogene homolog 1                                                                           |
| 1.2 | 1.2 | 1.2 | HELLS    | helicase, lymphoid specific<br>amyotrophic lateral sclerosis 2 (juvenile) chromosome region, candidate 2 homolog           |
| 1.2 | 1.2 | 1.2 | ALS2CR2  |                                                                                                                            |
| 1.1 | 1.2 | 1.2 | BCL2L2   | Bcl2-like 2                                                                                                                |
| 1.0 | 1.3 | 1.2 | BIRC5    | baculoviral IAP repeat-containing 5 (survivin)                                                                             |
| 1.0 | 1.3 | 1.2 | CASP8AP2 | CASP8 associated protein 2                                                                                                 |
| 1.3 | 1.0 | 1.2 | FASTK    | Fas-activated serine/threonine kinase                                                                                      |
| 1.2 | 1.1 | 1.2 | ASC      | apoptosis-associated speck-like protein containing a CARD                                                                  |
| 1.0 | 1.3 | 1.2 | BID      | BH3 interacting domain death agonist                                                                                       |
| 1.2 | 1.1 | 1.2 | CBX4     | chromobox homolog 4 (Pc class homolog, Drosophila)                                                                         |
| 1.1 | 1.2 | 1.2 | PMAIP1   | phorbol-12-myristate-13-acetate-induced protein 1                                                                          |
| 1.2 | 1.1 | 1.2 | PYCARD   | PYD and CARD domain containing                                                                                             |
| 1.1 | 1.1 | 1.1 | DEDD2    | death effector domain-containing DNA binding protein 2                                                                     |
| 1.0 | 1.2 | 1.1 | NGFRAP1  | nerve growth factor receptor (TNFRSF16) associated protein 1                                                               |
| 1.1 | 1.2 | 1.1 | PDCD11   | programmed cell death 11                                                                                                   |
| 1.0 | 1.2 | 1.1 | BNIP1    | BCL2/adenovirus E1B 19kDa-interacting protein 1, NIP1                                                                      |
| 1.1 | 1.1 | 1.1 | CASP2    | caspase 2, apoptosis-related cysteine protease                                                                             |
| 1.1 | 1.1 | 1.1 | DAPK1    | death-associated protein kinase 1                                                                                          |
| 0.9 | 1.3 | 1.1 | DFFA     | DNA fragmentation factor, 45kDa, alpha polypeptide                                                                         |
| 1.1 | 1.1 | 1.1 | GPX1     | glutathione peroxidase 1                                                                                                   |
| 1.1 | 1.1 | 1.1 | SCOTIN   | scotin                                                                                                                     |
| 1.1 | 1.0 | 1.1 | FAIM     | Fas apoptotic inhibitory molecule                                                                                          |
| 1.1 | 1.1 | 1.1 | STK3     | serine/threonine kinase 3 (STE20 homolog, yeast)                                                                           |
| 1.0 | 1.1 | 1.1 | CARD10   | caspase recruitment domain family, member 10                                                                               |
| 1.0 | 1.1 | 1.1 | MCL-1    | myeloid cell leukemia sequence 1                                                                                           |

|     |     |     |         |                                                        |
|-----|-----|-----|---------|--------------------------------------------------------|
| 1.1 | 1.0 | 1.1 | PERP    | PERP, TP53 apoptosis effector                          |
| 1.0 | 1.0 | 1.0 | AKT1    | v-akt murine thymoma viral oncogene homolog 1          |
| 0.9 | 1.1 | 1.0 | BAX     | BCL2-associated X protein                              |
| 0.9 | 1.1 | 1.0 | BIRC1   | baculoviral IAP repeat-containing 1                    |
| 0.9 | 1.1 | 1.0 | Birc1e  | baculoviral IAP repeat-containing 1e                   |
| 0.8 | 1.2 | 1.0 | CARD14  | caspase recruitment domain family, member 14           |
| 0.9 | 1.1 | 1.0 | PDCD6IP | programmed cell death 6 interacting protein            |
| 1.0 | 1.0 | 1.0 | POLB    | polymerase (DNA directed), beta                        |
| 0.9 | 1.0 | 1.0 | PIM2    | proviral integration site 2                            |
| 0.9 | 1.0 | 1.0 | NDUFA13 | NADH dehydrogenase (ubiquinone) 1 alpha subcomplex, 13 |
| 0.9 | 1.0 | 0.9 | SGKL    | serum/glucocorticoid regulated kinase 3                |
| 0.8 | 1.0 | 0.9 | CASP8   | caspase 8, apoptosis-related cysteine protease         |
| 0.9 | 0.9 | 0.9 | CIDEA   | cell death-inducing DFFA-like effector a               |
| 0.9 | 0.9 | 0.9 | BMF     | Bcl-2 modifying factor                                 |
| 0.9 | 0.8 | 0.9 | CASP7   | caspase 7                                              |
| 0.9 | 0.7 | 0.8 | BAD     | BCL2-antagonist of cell death                          |
| 0.8 | 0.8 | 0.8 | CASP14  | caspase 14, apoptosis-related cysteine protease        |
| 0.8 | 0.8 | 0.8 | DAD1    | defender against cell death 1                          |
| 0.7 | 0.7 | 0.7 | EEF1A2  | eukaryotic translation elongation factor 1 alpha 2     |
| 0.6 | 0.6 | 0.6 | CASP6   | caspase 6                                              |

**Supplement Table 1B**

**Transcription factors**

| Array 1 | Array 2 | Mean | Name     | Description                                                          |
|---------|---------|------|----------|----------------------------------------------------------------------|
| 2.5     | 1.4     | 1.9  | LMX1A    | LIM homeobox transcription factor 1, alpha                           |
| 1.4     | 1.9     | 1.7  | TP73     | tumor protein p73                                                    |
| 1.2     | 2.0     | 1.6  | MBD4     | methyl-CpG binding domain protein 4                                  |
| 1.5     | 1.6     | 1.6  | FOXO1    | forkhead box O1A                                                     |
| 1.8     | 1.2     | 1.5  | PAX7     | paired box gene 7                                                    |
| 1.1     | 1.9     | 1.5  | REL      | v-rel reticuloendotheliosis viral oncogene homolog (avian)           |
| 1.3     | 1.2     | 1.3  | MYC      | v-myc myelocytomatosis viral oncogene homolog                        |
| 1.2     | 1.2     | 1.2  | PPP1R13B | protein phosphatase 1, regulatory (inhibitor) subunit 13B            |
| 1.2     | 1.2     | 1.2  | BTG2     | BTG family, member 2                                                 |
| 1.2     | 1.1     | 1.2  | TFDP1    | transcription factor Dp-1                                            |
| 1.2     | 1.1     | 1.2  | TIAL1    | TIA1 cytotoxic granule-associated RNA binding protein-like 1         |
| 1.2     | 1.1     | 1.2  | MYCN     | v-myc myelocytomatosis viral related oncogene, neuroblastoma derived |
| 1.1     | 1.0     | 1.1  | TP73L    | tumor protein p73-like                                               |

|     |     |     |        |                                                            |
|-----|-----|-----|--------|------------------------------------------------------------|
| 1.0 | 1.2 | 1.1 | BCL6   | B-cell CLL/lymphoma 6 (zinc finger protein 51)             |
| 1.1 | 1.1 | 1.1 | Mycs   | myc-like oncogene, s-myc protein                           |
| 1.0 | 1.1 | 1.1 | TCF7   | transcription factor 7, T-cell specific                    |
| 1.0 | 1.2 | 1.1 | HDAC3  | Histone deacetylase 3                                      |
| 1.1 | 1.0 | 1.1 | STAT1  | signal transducer and activator of transcription 1         |
| 1.0 | 1.1 | 1.0 | ANK2   | ankyrin 2, brain                                           |
| 1.0 | 1.0 | 1.0 | MKL1   | megakaryoblastic leukemia (translocation) 1                |
| 0.9 | 1.1 | 1.0 | AATF   | apoptosis antagonizing transcription factor                |
| 1.0 | 1.0 | 1.0 | JUN    | v-jun sarcoma virus 17 oncogene homolog (avian)            |
|     |     |     |        | nuclear factor of kappa light polypeptide gene enhancer in |
| 1.0 | 1.0 | 1.0 | NFKBIA | B-cells inhibitor, alpha                                   |
| 0.9 | 1.0 | 1.0 | LHX4   | LIM homeobox protein 4                                     |
|     |     |     |        | TAF10 RNA polymerase II, TATA box binding protein          |
| 0.9 | 0.9 | 0.9 | TAF10  | (TBP)-associated factor                                    |
| 0.9 | 0.9 | 0.9 | ATF5   | activating transcription factor 5                          |

**Supplement Table 1C**

**Intercellular  
signalling**

| Array<br>1 | Array<br>2 | Mea<br>n | Name    | Description                                        |
|------------|------------|----------|---------|----------------------------------------------------|
| 1.5        | 2.1        | 1.8      | DNASE1  | deoxyribonuclease I                                |
| 1.8        | 1.6        | 1.7      | DEDD    | death effector domain containing                   |
| 1.7        | 1.7        | 1.7      | IRAK2   | interleukin-1 receptor-associated kinase 2         |
| 1.4        | 1.8        | 1.6      | IL1B    | interleukin-1 beta precursor                       |
|            |            |          |         | tumor necrosis factor (ligand) superfamily, member |
| 1.4        | 1.6        | 1.5      | TNFSF4  | 4                                                  |
| 1.5        | 1.5        | 1.5      | TRADD   | TNFRSF1A-associated via death domain               |
|            |            |          |         | tumor necrosis factor (ligand) superfamily, member |
| 1.3        | 1.5        | 1.4      | TNFSF12 | 12                                                 |
| 1.4        | 1.3        | 1.4      | CCL2    | chemokine (C-C motif) ligand 2                     |
|            |            |          |         | estrogen receptor-binding fragment-associated gene |
| 1.3        | 1.3        | 1.3      | EBAG9   | 9                                                  |
| 1.2        | 1.3        | 1.3      | IL18    | interleukin-18 precursor (il-18)                   |
| 1.2        | 1.3        | 1.3      | RABEP1  | rabaptin, RAB GTPase binding effector protein 1    |
|            |            |          |         | tumor necrosis factor (ligand) superfamily, member |
| 1.2        | 1.3        | 1.2      | TNFSF6  | 6                                                  |
| 1.1        | 1.3        | 1.2      | IL10    | interleukin-10 precursor                           |
| 1.2        | 1.2        | 1.2      | APLP1   | amyloid beta (A4) precursor-like protein 1         |
| 1.1        | 1.2        | 1.2      | INHA    | inhibin alpha chain precursor                      |
| 1.2        | 1.1        | 1.2      | FASLG   | Fas ligand (TNF superfamily, member 6)             |

|     |     |     |          |                                                         |
|-----|-----|-----|----------|---------------------------------------------------------|
| 1.0 | 1.3 | 1.1 | DNASE2   | deoxyribonuclease II alpha                              |
| 1.1 | 1.1 | 1.1 | TPT1     | tumor protein, translationally-controlled 1             |
| 0.9 | 1.3 | 1.1 | VEGF     | vascular endothelial growth factor                      |
| 1.1 | 1.1 | 1.1 | SULF1    | sulfatase 1                                             |
| 1.1 | 1.1 | 1.1 | IRAK3    | interleukin-1 receptor-associated kinase 3              |
| 1.0 | 1.2 | 1.1 | YARS     | tyrosyl-tRNA synthetase                                 |
| 1.0 | 1.1 | 1.1 | GZMA     | granzyme A                                              |
| 1.0 | 1.0 | 1.0 | GRIM19   | genes associated with retinoid-IFN-induced mortality 19 |
| 0.9 | 1.0 | 1.0 | VDAC1    | voltage-dependent anion channel 1                       |
| 1.0 | 1.0 | 1.0 | APP      | amyloid beta (A4) precursor protein                     |
| 0.8 | 1.1 | 1.0 | IGF1     | insulin-like growth factor 1                            |
| 0.8 | 0.8 | 0.8 | LGALS7   | lectin, galactose binding, soluble 7                    |
| 0.6 | 1.0 | 0.8 | PGLYRP1  | peptidoglycan recognition protein 1                     |
| 0.6 | 0.7 | 0.7 | DNASE1L3 | deoxyribonuclease 1-like 3                              |
| 0.2 | 0.9 | 0.6 | NGFB     | nerve growth factor, beta polypeptide                   |

### Supplement Table 1D

#### Intracellular signalling & receptors

| Array 1 | Array 2 | Mean | Name     | Description                                                                                                          |
|---------|---------|------|----------|----------------------------------------------------------------------------------------------------------------------|
| 0.7     | 2.5     | 1.6  | EDAR     | ectodysplasin A receptor                                                                                             |
| 1.4     | 1.7     | 1.6  | CXCR4    | chemokine (C-X-C motif) receptor 4                                                                                   |
| 1.4     | 1.6     | 1.5  | FAS      | Fas (TNF receptor superfamily, member 6)                                                                             |
| 1.4     | 1.6     | 1.5  | TNFRSF4  | tumor necrosis factor receptor superfamily, member 4                                                                 |
| 1.5     | 1.5     | 1.5  | TNFR1    | tumor necrosis factor receptor superfamily, member 1A                                                                |
| 1.5     | 1.5     | 1.5  | TNFRSF1A | tumor necrosis factor receptor superfamily, member 1a<br>CASP2 and RIPK1 domain containing adaptor with death domain |
| 1.0     | 1.9     | 1.5  | CRADD    | death domain                                                                                                         |
| 0.8     | 2.1     | 1.5  | ADORA1   | adenosine A1 receptor                                                                                                |
| 1.6     | 1.3     | 1.5  | MAP2K6   | mitogen-activated protein kinase kinase 6                                                                            |
| 1.4     | 1.5     | 1.5  | RHOB     | ras homolog gene family, member B                                                                                    |
| 1.2     | 1.5     | 1.4  | ABL1     | v-abl Abelson murine leukemia viral oncogene homolog 1                                                               |
| 1.1     | 1.6     | 1.4  | CD5L     | CD5 antigen-like (scavenger receptor cysteine rich family)                                                           |
| 1.3     | 1.4     | 1.4  | ITGB3BP  | integrin beta 3 binding protein (beta3-endonexin)                                                                    |
| 1.5     | 1.2     | 1.4  | MAPKK4   | mitogen-activated protein kinase kinase kinase 4                                                                     |
| 1.3     | 1.3     | 1.3  | ROCK1    | Rho-associated, coiled-coil containing protein kinase 1                                                              |
| 1.4     | 1.2     | 1.3  | MALT1    | mucosa associated lymphoid tissue lymphoma translocation gene 1                                                      |
| 1.3     | 1.3     | 1.3  | RIPK1    | receptor (TNFRSF)-interacting serine-threonine kinase 1                                                              |

|     |     |     |          |                                                                        |
|-----|-----|-----|----------|------------------------------------------------------------------------|
| 1.2 | 1.3 | 1.3 | LTBR     | lymphotoxin beta receptor                                              |
| 0.9 | 1.6 | 1.3 | TNFRSF7  | tumor necrosis factor receptor superfamily, member 7                   |
| 1.2 | 1.3 | 1.3 | TRAF3    | TNF receptor-associated factor 3                                       |
| 1.3 | 1.1 | 1.2 | MAPK1    | mitogen-activated protein kinase 1                                     |
| 1.1 | 1.3 | 1.2 | MAPK3    | mitogen-activated protein kinase 3                                     |
| 1.5 | 0.9 | 1.2 | NGFR     | nerve growth factor receptor precursor, low affinity                   |
| 1.2 | 1.2 | 1.2 | RAF-1    | v-raf-1 murine leukemia viral oncogene homolog 1                       |
| 1.3 | 0.9 | 1.1 | TNFRSF25 | tumor necrosis factor receptor superfamily, member 25                  |
| 1.1 | 1.1 | 1.1 | YWHAH    | tyrosine 3-monooxygenase/tryptophan 5-monooxygenase activation protein |
| 1.1 | 1.0 | 1.1 | MAP2K1   | mitogen-activated protein kinase kinase 1                              |
| 1.2 | 0.9 | 1.1 | BTK      | Bruton agammaglobulinemia tyrosine kinase                              |
| 1.0 | 1.1 | 1.0 | TRAF4    | Tnf receptor associated factor 4                                       |
| 1.1 | 1.0 | 1.0 | PTDSR    | phosphatidylserine receptor                                            |
| 1.1 | 1.0 | 1.0 | PTDSR    | phosphatidylserine receptor                                            |
| 1.0 | 1.0 | 1.0 | TRAF1    | Tnf receptor-associated factor 1                                       |
| 0.9 | 1.1 | 1.0 | MAP3K5   | mitogen-activated protein kinase kinase kinase 5                       |
| 1.0 | 0.8 | 0.9 | TRAF2    | TNF receptor-associated factor 2                                       |
| 0.9 | 0.9 | 0.9 | GADD45B  | growth arrest and DNA-damage-inducible, beta                           |
| 0.8 | 0.9 | 0.9 | CDC42BPA | CDC42 binding protein kinase alpha (DMPK-like)                         |
| 0.6 | 1.0 | 0.8 | TNFRSF21 | tumor necrosis factor receptor superfamily, member 21                  |
| 0.7 | 0.9 | 0.8 | MAP2K4   | mitogen-activated protein kinase kinase 4                              |
| 0.7 | 0.9 | 0.8 | TRAF5    | TNF receptor-associated factor 5                                       |
| 0.6 | 0.7 | 0.7 | MAP2K3   | mitogen-activated protein kinase kinase 3                              |

### Table

Diabetes leads to greater induction of genes that promote apoptosis. Formalin killed *P. gingivalis* was inoculated into the scalp of diabetic mice (db/db) and normoglycemic littermates (db/+) to induce an injury to connective tissue and bone resorption. At the peak healing period, 8 days, mice were euthanized and total RNA was extracted from the healing tissue. mRNA profiling was carried out using Affymetrix microarrays and the results analyzed by PathwayAssist and ArrayAssist software to quantify the mRNA levels of genes that directly or indirectly affect apoptosis. Shown are mRNA levels that exhibited less than a two fold difference in the diabetic versus normoglycemic mice.
